# Supplementary material for: Bioclimatic Envelopes for Two Bat Species from a Tropical Island: Insights on Current and Future Distribution from Ecological Niche Modeling
Source: MDPI journal article supplement (doi:10.3390/d14070506), 2022-06-22
Supplement: s1 [file s1]

**Table S1.** AUC values of MaxEnt models under the current and future (2050) scenarios based on GFDL-CM3 and NorESM1-M data sets.

| Species           | Current       |               | Future (2050)<br>GFDL-CM3 |               | Future (2050)<br>NorESM1-M |               |
|-------------------|---------------|---------------|---------------------------|---------------|----------------------------|---------------|
|                   | Training      | Testing       | Training                  | Testing       | Training                   | Testing       |
| <i>K. picta</i>   | 0.762 ± 0.082 | 0.732 ± 0.182 | 0.757 ± 0.115             | 0.693 ± 0.115 | 0.754 ± 0.094              | 0.768 ± 0.094 |
| <i>K. malpasi</i> | 0.966 ± -1.00 | 0.827 ± -1.00 | 0.944 ± -1.00             | 0.838 ± -1.00 | 0.952 ± -1.00              | 0.830 ± -1.00 |

**Table S2.** Predicted suitable areas for *Kerivoula picta* and *Kerivoula malpasi* under current and future (Year 2050) scenarios based on GFDL-CM3 and NorESM1-M (km<sup>2</sup>) Unsuitable 0–0.2, less suitable 0.2–0.4, moderately suitable 0.4–0.6, and highly suitable 0.6–1.0.

| Species           | Current  |                |        |                | Future (2050)<br>GFDL-CM3 |        |        |         | Future (2050)<br>NorESM1-M |        |        |           |
|-------------------|----------|----------------|--------|----------------|---------------------------|--------|--------|---------|----------------------------|--------|--------|-----------|
|                   | Highly   | Moderat<br>ely | Less   | Unsuit<br>able | Highly                    | Moder. | Less   | Unsuit. | Highly                     | Moder. | Less   | Unsuited. |
|                   | Suitable | Suitable       | Suita. |                | Suita.                    | Suita. | Suita. |         | Suita.                     | Suita. | Suita. |           |
| <i>K. picta</i>   | 6188     | 18,626         | 39,316 | 1425           | 6869                      | 20,072 | 37,614 | 213     | 7400                       | 19,307 | 37,614 | 468       |
| <i>K. malpasi</i> | 1935     | 5826           | 18,435 | 39,358         | 2041                      | 6932   | 20,519 | 35,297  | 2615                       | 5209   | 21,667 | 35,297    |

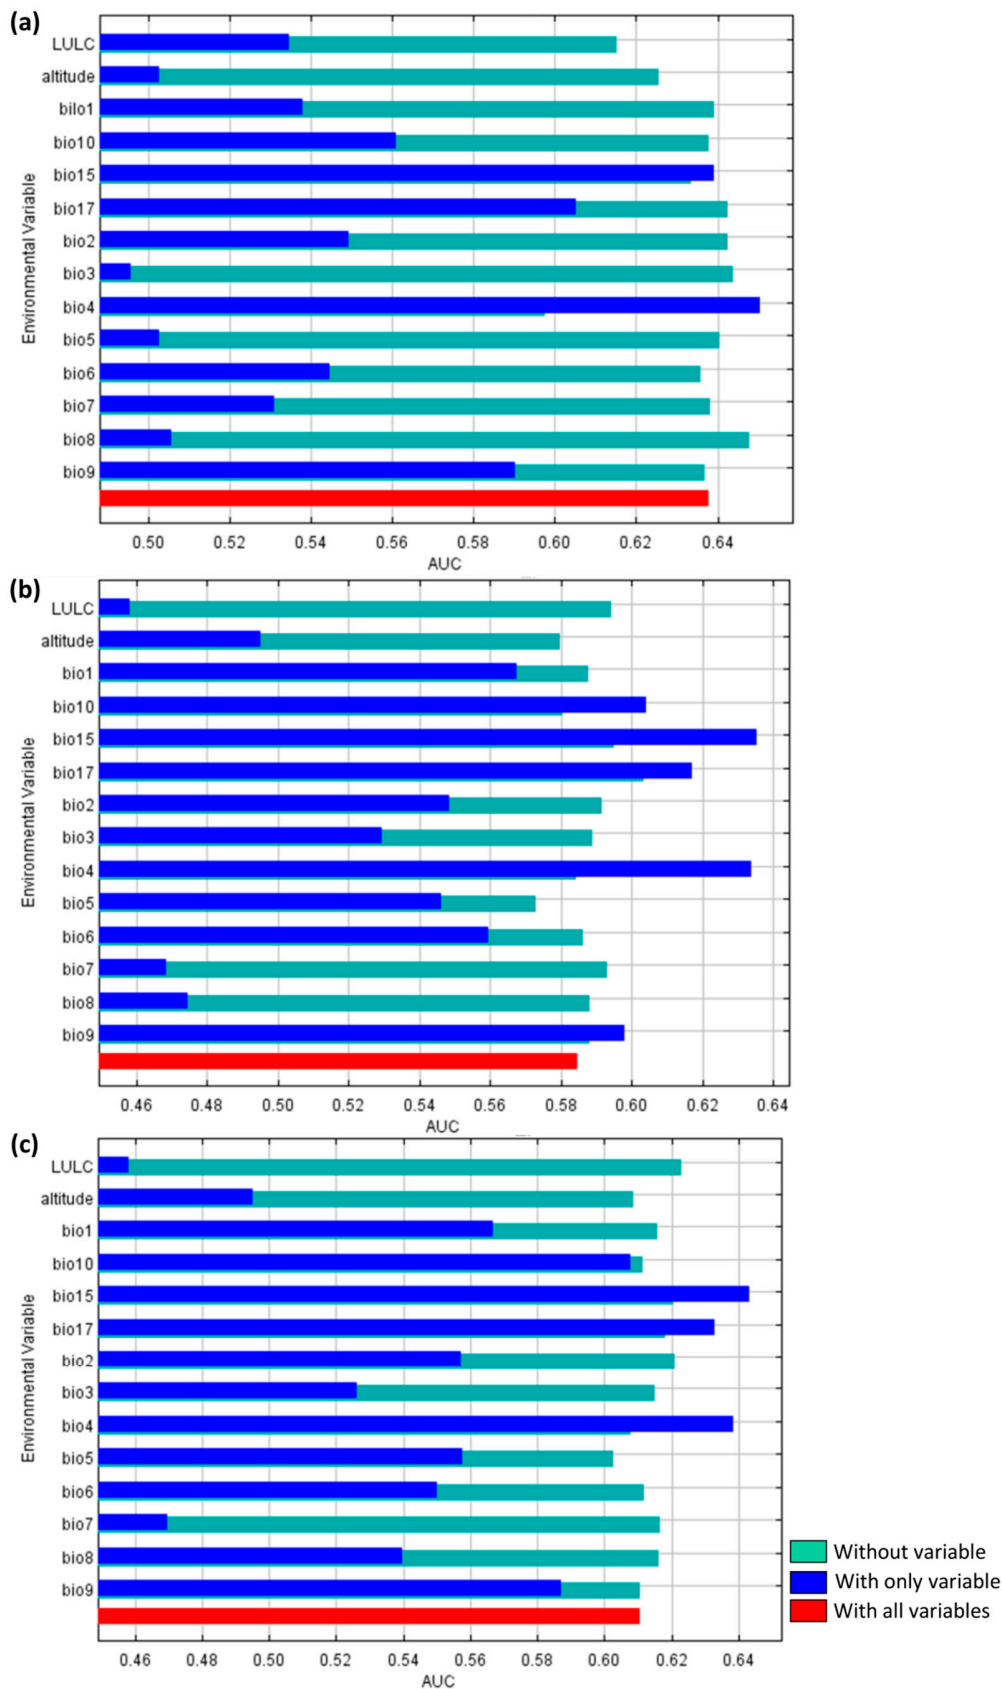

**Figure S1.** Relative predictive power of different environmental variables based on the Jackknife of regularized training gain in MaxEnt model for *K. picta* (a) current (b) for the predicted scenario in the year 2050 based on GFDL-CM3 (c) for the predicted scenario in the year 2050 based on NorESM1-M.

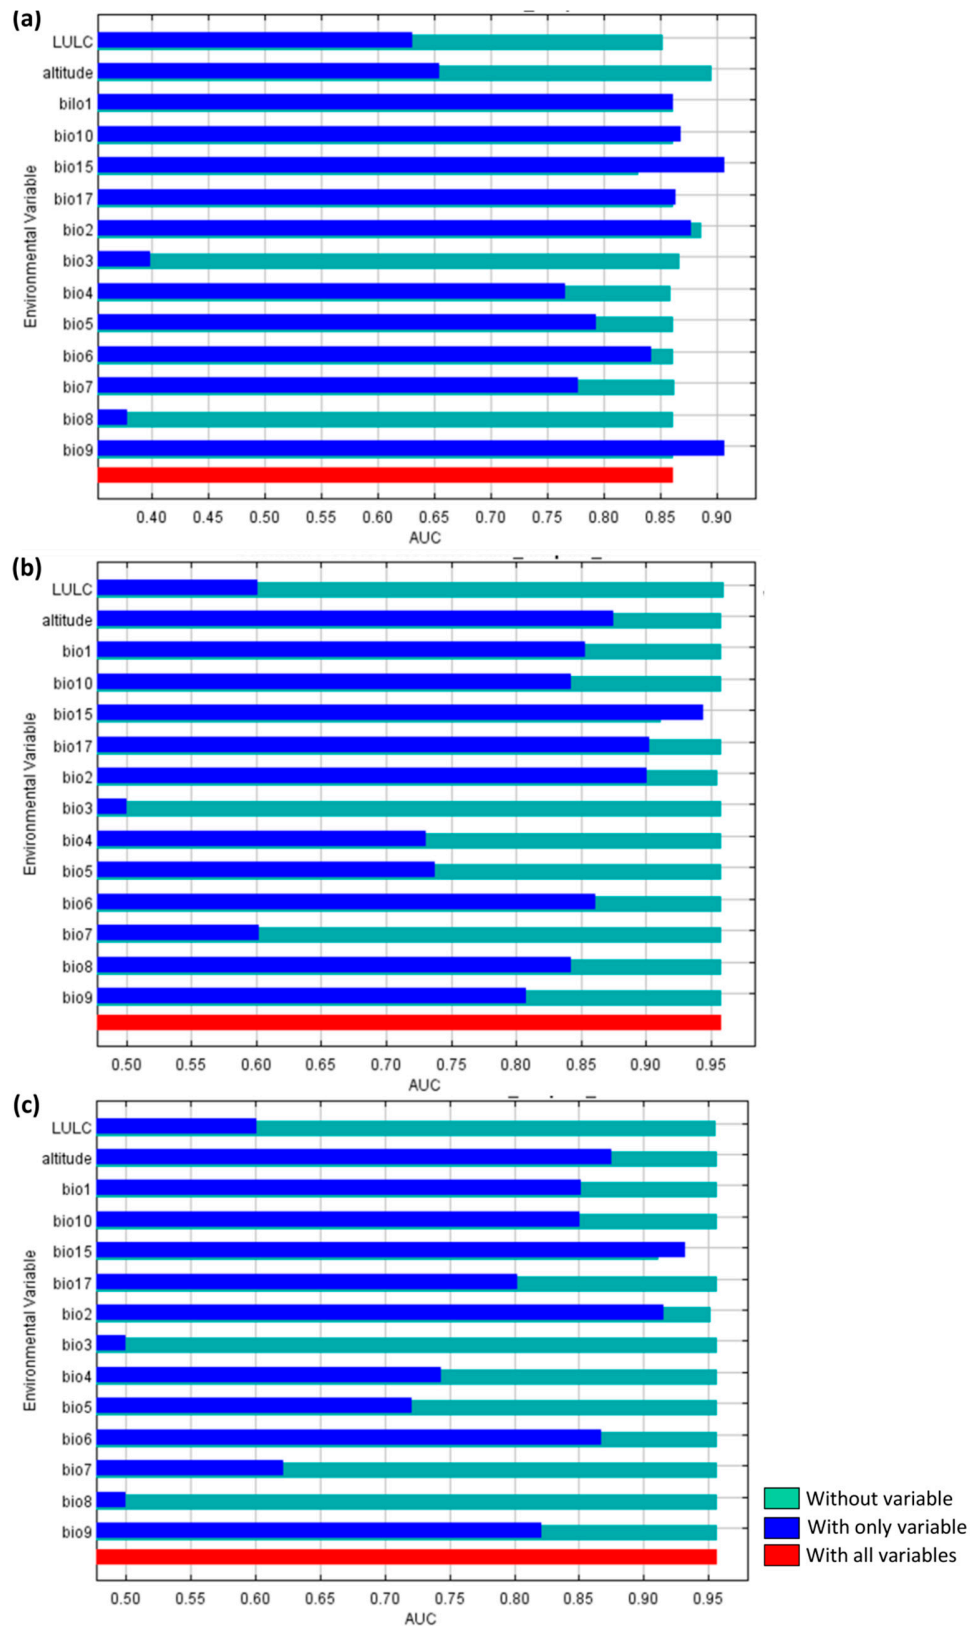

**Figure S2.** Relative predictive power of different environmental variables based on the Jackknife of regularized training gain in MaxEnt model for *K. malpasi* (a) current (b) for the predicted scenario in the year 2050 based on GFDL-CM3 (c) for the predicted scenario in the year 2050 based on NorESM1-M.
