# Supplementary material for: Bioclimatic Envelopes for Two Bat Species from a Tropical Island: Insights on Current and Future Distribution from Ecological Niche Modeling
Source: MDPI journal article supplement (doi:10.3390/d14070506), 2022-06-22
Supplement: s1 [file s1]

Archive with 1 entries (1 files):
- diversity-1693287-supplementary.pdf
